# Supplementary material for: Survey on the perceptions of Asian endoscopists to artificial intelligence
Source: Research Square preprint supplement (doi:10.21203/rs.3.rs-4093441/v1), 2024-04-14
Supplement: Supplementary file 1 [file 424ae0545111699c82026a4b.pdf]

### Supplementary Tables

**Table S1:** Participants' demographics, experience and familiarity stratified by their prior exposure to AI endoscopy.

| Questions                 |                       | Not exposed (n=123) | Exposed (n=170) | Total (n=293) | pvalue |
|---------------------------|-----------------------|---------------------|-----------------|---------------|--------|
| Region of Practice        | CHINA                 | 15 (12.2)           | 29 (17.1)       | 44 (15.0)     | <0.001 |
|                           | HONGKONG              | 23 (18.7)           | 31 (18.2)       | 54 (18.4)     |        |
|                           | INDIA                 | 7 (5.7)             | 8 (4.7)         | 15 (5.1)      |        |
|                           | INDONESIA             | 2 (1.6)             | 1 (0.6)         | 3 (1.0)       |        |
|                           | JAPAN                 | 2 (1.6)             | 30 (17.6)       | 32 (10.9)     |        |
|                           | MALAYSIA              | 7 (5.7)             | 1 (0.6)         | 8 (2.7)       |        |
|                           | PHILIPPINES           | 20 (16.3)           | 4 (2.4)         | 24 (8.2)      |        |
|                           | SINGAPORE             | 14 (11.4)           | 35 (20.6)       | 49 (16.7)     |        |
|                           | SOUTHKOREA            | 25 (20.3)           | 20 (11.8)       | 45 (15.4)     |        |
|                           | VIETNAM               | 8 (6.5)             | 11 (6.5)        | 19 (6.5)      |        |
|                           |                       |                     |                 |               |        |
| Institution               | PRIVATE               | 50 (40.7)           | 21 (12.4)       | 71 (24.2)     | <0.001 |
|                           | PUBLIC                | 73 (59.3)           | 149 (87.6)      | 222 (75.8)    |        |
| Experience                | High                  | 57 (46.3)           | 64 (37.6)       | 121 (41.3)    | 0.17   |
|                           | Low                   | 66 (53.7)           | 106 (62.4)      | 172 (58.7)    |        |
| Cumulative Scopes         | a.0 to 100            | 27 (22.0)           | 25 (14.7)       | 52 (17.7)     | 0.008  |
|                           | b.100 to 500          | 30 (24.4)           | 24 (14.1)       | 54 (18.4)     |        |
|                           | c.More than 500       | 66 (53.7)           | 121 (71.2)      | 187 (63.8)    |        |
| Scopes per Week           | a.0 to 20             | 86 (69.9)           | 114 (67.1)      | 200 (68.3)    | 0.477  |
|                           | b.20 to 40            | 30 (24.4)           | 38 (22.4)       | 68 (23.2)     |        |
|                           | c.40 to 60            | 3 (2.4)             | 10 (5.9)        | 13 (4.4)      |        |
|                           | d.More than 60        | 4 (3.3)             | 8 (4.7)         | 12 (4.1)      |        |
| Adenoma Detection Rate    | Mean (SD)             | 0.4 (0.3)           | 0.4 (0.2)       | 0.4 (0.2)     | 0.865  |
| Received AI teaching      | No                    | 116 (94.3)          | 122 (71.8)      | 238 (81.2)    | <0.001 |
|                           | Yes                   | 7 (5.7)             | 48 (28.2)       | 55 (18.8)     |        |
| Completed AI Courses      | No                    | 120 (97.6)          | 146 (85.9)      | 266 (90.8)    | 0.001  |
|                           | Yes                   | 3 (2.4)             | 24 (14.1)       | 27 (9.2)      |        |
| Familiar with AI research | a.Not familiar        | 78 (63.4)           | 30 (17.6)       | 108 (36.9)    | <0.001 |
|                           | b.Slightly familiar   | 38 (30.9)           | 76 (44.7)       | 114 (38.9)    |        |
|                           | c.Moderately familiar | 6 (4.9)             | 45 (26.5)       | 51 (17.4)     |        |
|                           | d.Very familiar       | 1 (0.8)             | 19 (11.2)       | 20 (6.8)      |        |
| Familiar with AI methods  | a.Not familiar        | 88 (71.5)           | 47 (27.6)       | 135 (46.1)    | <0.001 |
|                           | b.Slightly familiar   | 28 (22.8)           | 82 (48.2)       | 110 (37.5)    |        |
|                           | c.Moderately familiar | 6 (4.9)             | 28 (16.5)       | 34 (11.6)     |        |
|                           | d.Very familiar       | 1 (0.8)             | 24 (14.1)       | 14 (4.8)      |        |
| Read AI papers            | a.None                | 45 (36.6)           | 12 (7.1)        | 57 (19.5)     | <0.001 |
|                           | b.Less than 5         | 64 (52.0)           | 70 (41.2)       | 134 (45.7)    |        |
|                           | c.5 to 20             | 10 (8.1)            | 52 (30.6)       | 62 (21.2)     |        |
|                           | d.More than 20        | 4 (3.3)             | 36 (21.2)       | 40 (13.7)     |        |

**Table S2:** Response to survey items stratified by their prior exposure to AI endoscopy.

| Theme                            | Questions                                                                                                                             |       | Not exposed (n=123) | Exposed (n=170) | Total (n=293) | pvalue |
|----------------------------------|---------------------------------------------------------------------------------------------------------------------------------------|-------|---------------------|-----------------|---------------|--------|
| Barriers to AI clinical adoption | Accountability for wrong diagnoses is a challenge to using AI in clinical practice.                                                   | Agree | 90 (73.2)           | 103 (60.6)      | 193 (65.9)    | 0.034  |
|                                  | Biases of algorithms are a challenge to using AI in clinical practice.                                                                | Agree | 81 (65.9)           | 116 (68.2)      | 197 (67.2)    | 0.762  |
|                                  | Transparency of the methods used to develop algorithms is a challenge to using AI in clinical practice.                               | Agree | 67 (54.5)           | 111 (65.3)      | 178 (60.8)    | 0.08   |
|                                  | Staying up to date with AI advances is a challenge to using AI in clinical practice.                                                  | Agree | 84 (68.3)           | 118 (69.4)      | 202 (68.9)    | 0.939  |
|                                  | Explainability of algorithms is a challenge to using AI in clinical practice.                                                         | Agree | 88 (71.5)           | 105 (61.8)      | 193 (65.9)    | 0.106  |
|                                  | Impact on working practices is a challenge to using AI in clinical practice.                                                          | Agree | 90 (73.2)           | 112 (65.9)      | 202 (68.9)    | 0.229  |
|                                  | Data protection is a challenge to using AI in clinical practice.                                                                      | Agree | 71 (57.7)           | 107 (62.9)      | 178 (60.8)    | 0.435  |
|                                  | The impact on the clinical workforce is a challenge to using AI in clinical practice.                                                 | Agree | 74 (60.2)           | 109 (64.1)      | 183 (62.5)    | 0.57   |
|                                  | Lack of guidelines is a barrier to adopting AI into clinical practice.                                                                | Agree | 95 (77.2)           | 122 (71.8)      | 217 (74.1)    | 0.358  |
|                                  | Access to AI devices is a barrier to adopting AI into clinical practice.                                                              | Agree | 98 (79.7)           | 135 (79.4)      | 233 (79.5)    | 1      |
|                                  | Availability of devices with regulatory approval is a barrier to adopting AI into clinical practice.                                  | Agree | 103 (83.7)          | 138 (81.2)      | 241 (82.3)    | 0.68   |
|                                  | Evidence for cost-effectiveness is a barrier to adopting AI into clinical practice.                                                   | Agree | 89 (72.4)           | 115 (67.6)      | 204 (69.6)    | 0.461  |
|                                  | Procurement is a barrier to adopting AI into clinical practice.                                                                       | Agree | 88 (71.5)           | 111 (65.3)      | 199 (67.9)    | 0.315  |
|                                  | Lack of clinical trials is a barrier to adopting AI into clinical practice.                                                           | Agree | 94 (76.4)           | 97 (57.1)       | 191 (65.2)    | 0.001  |
|                                  | Impact on clinical workflow is a barrier to adopting AI into clinical practice.                                                       | Agree | 74 (60.2)           | 94 (55.3)       | 168 (57.3)    | 0.477  |
|                                  | Ethical concerns are a barrier to adopting AI into clinical practice.                                                                 | Agree | 74 (60.2)           | 85 (50.0)       | 159 (54.3)    | 0.109  |
|                                  | Funding is a barrier to AI research in gastroenterology.                                                                              | Agree | 81 (65.9)           | 109 (64.1)      | 190 (64.8)    | 0.855  |
|                                  | Availability of annotated data is a barrier to AI research in gastroenterology.                                                       | Agree | 83 (67.5)           | 120 (70.6)      | 203 (69.3)    | 0.659  |
|                                  | Access to Big Data is a barrier to AI research in gastroenterology.                                                                   | Agree | 71 (57.7)           | 119 (70.0)      | 190 (64.8)    | 0.041  |
|                                  | National ethics/R&D processes are a barrier to AI research in gastroenterology.                                                       | Agree | 75 (61.0)           | 106 (62.4)      | 181 (61.8)    | 0.906  |
| Priority for AP AI Task Force    | Local ethics/R&D processes are a barrier to AI research in gastroenterology.                                                          | Agree | 73 (59.3)           | 97 (57.1)       | 170 (58.0)    | 0.785  |
|                                  | Involvement of computer scientist collaborators is a barrier to AI research in gastroenterology.                                      | Agree | 73 (59.3)           | 99 (58.2)       | 172 (58.7)    | 0.943  |
|                                  | Involvement of clinical collaborators is a barrier to AI research in gastroenterology.                                                | Agree | 68 (55.3)           | 79 (46.5)       | 147 (50.2)    | 0.17   |
|                                  | Involvement of commercial companies is a barrier to AI research in gastroenterology.                                                  | Agree | 63 (51.2)           | 70 (41.2)       | 133 (45.4)    | 0.113  |
|                                  | Identifying research priorities for AI should be a priority for Asian-Pacific gastroenterologists.                                    | Agree | 92 (74.8)           | 120 (70.6)      | 212 (72.4)    | 0.508  |
|                                  | Guidelines for adopting AI devices in clinical practice should be a priority for Asian-Pacific gastroenterologists.                   | Agree | 100 (81.3)          | 123 (72.4)      | 223 (76.1)    | 0.102  |
|                                  | Supporting delivery of multi-centre AI trials should be a priority for Asian-Pacific gastroenterologists.                             | Agree | 98 (79.7)           | 136 (80.0)      | 234 (79.9)    | 1      |
|                                  | Developing a resource of up-to-date AI research (e.g., webpage) should be a priority for Asian-Pacific gastroenterologists.           | Agree | 103 (83.7)          | 128 (75.3)      | 231 (78.8)    | 0.109  |
|                                  | Developing a forum to report safety concerns with AI devices should be a priority for Asian-Pacific gastroenterologists.              | Agree | 97 (78.9)           | 133 (78.2)      | 230 (78.5)    | 1      |
|                                  | Developing a peer review process for AI research should be a priority for Asian-Pacific gastroenterologists.                          | Agree | 104 (84.6)          | 131 (77.1)      | 235 (80.2)    | 0.15   |
| Percieved benefits of AI         | Developing a training programme for using AI devices in clinical practice should be a priority for Asian-Pacific gastroenterologists. | Agree | 106 (86.2)          | 126 (74.1)      | 232 (79.2)    | 0.018  |
|                                  | Developing a reference paper guide for people interested in AI should be a priority for Asian-Pacific gastroenterologists.            | Agree | 101 (82.1)          | 137 (80.6)      | 238 (81.2)    | 0.858  |
|                                  | Supporting funding applications for AI research should be a priority for Asian-Pacific gastroenterologists.                           | Agree | 98 (79.7)           | 141 (82.9)      | 239 (81.6)    | 0.576  |
|                                  | Quality improvement is a significant benefit that AI might eventually bring to gastroenterology.                                      | Agree | 108 (87.8)          | 158 (92.9)      | 266 (90.8)    | 0.195  |
|                                  | Better diagnosis is a significant benefit that AI might eventually bring to gastroenterology.                                         | Agree | 107 (87.0)          | 158 (92.9)      | 265 (90.4)    | 0.132  |
|                                  | Automated reporting is a significant benefit that AI might eventually bring to gastroenterology.                                      | Agree | 101 (82.1)          | 139 (81.8)      | 240 (81.9)    | 1      |
|                                  | Fewer clinic appointments are a significant benefit that AI might eventually bring to gastroenterology.                               | Agree | 62 (50.4)           | 87 (51.2)       | 149 (50.9)    | 0.991  |
|                                  | Faster endoscopy procedure times are a significant benefit that AI might eventually bring to gastroenterology.                        | Agree | 75 (61.0)           | 94 (55.3)       | 169 (57.7)    | 0.394  |
|                                  | Real time endoscopic image diagnosis should be a priority of AI research.                                                             | Agree | 102 (82.9)          | 149 (87.6)      | 251 (85.7)    | 0.333  |
|                                  | General quality improvement should be a priority of AI research.                                                                      | Agree | 111 (90.2)          | 159 (93.5)      | 270 (92.2)    | 0.417  |
| Priority Areas for AI Research   | Automated reporting should be a priority of AI research.                                                                              | Agree | 86 (69.9)           | 125 (73.5)      | 211 (72.0)    | 0.584  |
|                                  | Natural language processing should be a priority of AI research.                                                                      | Agree | 81 (65.9)           | 108 (63.5)      | 189 (64.5)    | 0.774  |

**Table S3:** Experience and familiarity of participants stratified by their self-perceived opinion of being an early adopter.

| Theme        | Questions              |                       | Not Early Adopters (n=105) | Early Adopters (188) | Total (n=293) | pvalue |
|--------------|------------------------|-----------------------|----------------------------|----------------------|---------------|--------|
| Demographics | Practice               | PRIVATE               | 24 (22.9)                  | 47 (25.0)            | 71 (24.2)     | 0.788  |
|              |                        | PUBLIC                | 81 (77.1)                  | 141 (75.0)           | 222 (75.8)    |        |
|              | Experience             | High                  | 42 (40.0)                  | 79 (42.0)            | 121 (41.3)    | 0.831  |
|              |                        | Low                   | 63 (60.0)                  | 109 (58.0)           | 172 (58.7)    |        |
|              | CumScopes              | a.0 to 100            | 22 (21.0)                  | 30 (16.0)            | 52 (17.7)     | 0.206  |
|              |                        | b.100 to 500          | 23 (21.9)                  | 31 (16.5)            | 54 (18.4)     |        |
|              |                        | c.More than 500       | 60 (57.1)                  | 127 (67.6)           | 187 (63.8)    |        |
|              | Scopes_perweek         | a.0 to 20             | 74 (70.5)                  | 126 (67.0)           | 200 (68.3)    | 0.531  |
|              |                        | b.20 to 40            | 25 (23.8)                  | 43 (22.9)            | 68 (23.2)     |        |
|              |                        | c.40 to 60            | 4 (3.8)                    | 9 (4.8)              | 13 (4.4)      |        |
|              |                        | d.More than 60        | 2 (1.9)                    | 10 (5.3)             | 12 (4.1)      |        |
|              | ADR                    | Mean (SD)             | 0.4 (0.2)                  | 0.4 (0.2)            | 0.4 (0.2)     | 0.33   |
| Familiarity  | Received_Aiteaching    | No                    | 100 (95.2)                 | 138 (73.4)           | 238 (81.2)    | <0.001 |
|              |                        | Yes                   | 5 (4.8)                    | 50 (26.6)            | 55 (18.8)     |        |
|              | Completed_Aicourse     | No                    | 102 (97.1)                 | 164 (87.2)           | 266 (90.8)    | 0.009  |
|              |                        | Yes                   | 3 (2.9)                    | 24 (12.8)            | 27 (9.2)      |        |
|              | FamiliarwithAlresearch | a.Not familiar        | 69 (65.7)                  | 39 (20.7)            | 108 (36.9)    | <0.001 |
|              |                        | b.Slightly familiar   | 28 (26.7)                  | 86 (45.7)            | 114 (38.9)    |        |
|              |                        | c.Moderately familiar | 8 (7.6)                    | 43 (22.9)            | 51 (17.4)     |        |
|              |                        | d.Very familiar       |                            | 20 (10.7)            | 20 (6.8)      |        |
|              | FamiliarwithAlmethods  | a.Not familiar        | 76 (72.4)                  | 59 (31.4)            | 135 (46.1)    | <0.001 |
|              |                        | b.Slightly familiar   | 26 (24.8)                  | 84 (44.7)            | 110 (37.5)    |        |
|              |                        | c.Moderately familiar | 3 (2.9)                    | 31 (16.5)            | 34 (11.6)     |        |
|              |                        | d.Very familiar       |                            | 14 (7.4)             | 14 (4.8)      |        |
|              | Read_Alpapers          | a.None                | 26 (24.8)                  | 31 (16.5)            | 57 (19.5)     | <0.001 |
|              |                        | b.Less than 5         | 61 (58.1)                  | 73 (38.8)            | 134 (45.7)    |        |
|              |                        | c.5 to 20             | 15 (14.3)                  | 47 (25.0)            | 62 (21.2)     |        |
|              |                        | d.More than 20        | 3 (2.9)                    | 37 (19.7)            | 40 (13.7)     |        |
